# Supplementary material
Source: PubMed Central journal article supplement (PMC2154436)

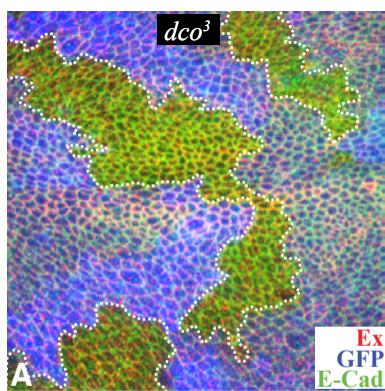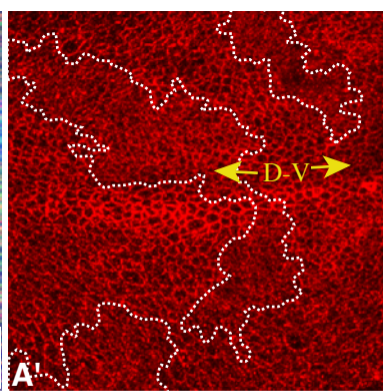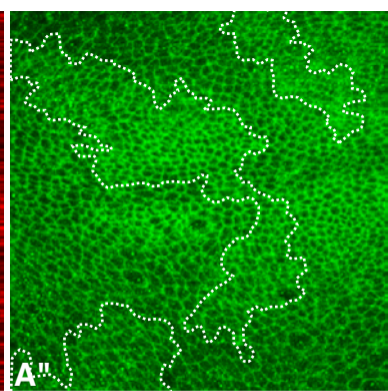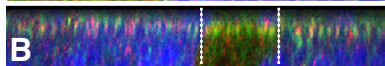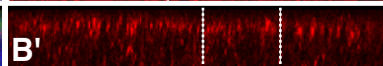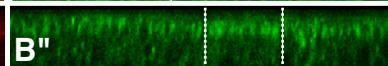

Supplement: supp_0706722105_06722Fig8.pdf [file supp_0706722105_06722Fig8.pdf]
